# Supplementary material for: A Transcription Elongation Factor That Links Signals from the Reproductive System to Lifespan Extension in Caenorhabditis elegans
Source: PubMed Central journal article supplement (PMC2729384; doi:10.1371/journal.pgen.1000639), 2009-09-11
Supplement: pgen.1000639.s007.pdf [file pgen.1000639.s007.pdf]

**Table S2: Effect of *tcer-1* overexpression on the lifespan of wild-type worms and long-lived mutants.**

| <b>Table S2. A: Effect of <i>tcer-1</i> overexpression on lifespan of wild-type worms</b>                |              |                             |                                |                            |                      |
|----------------------------------------------------------------------------------------------------------|--------------|-----------------------------|--------------------------------|----------------------------|----------------------|
| <b>Genotype</b>                                                                                          | <b>Trial</b> | <b>Mean LS ± SEM (days)</b> | <b>Events/ Obs<sup>a</sup></b> | <b>% Effect on control</b> | <b>P vs. control</b> |
| CF2144* <sup>@</sup><br>( <i>Podr-1::RFP</i> ) <i>muEx321</i><br>Co-injection marker (wild type) control | 1            | 17.4 ± 0.4                  | 81/89                          |                            |                      |
| CF2032*<br>( <i>Ptcer-1::tcer-1::GFP, Podr-1::RFP</i> )<br><i>muEx307</i>                                |              | 21.2 ± 0.4                  | 85/90                          | +21.8                      | <0.0001              |
| CF2033<br>( <i>Ptcer-1::tcer-1::GFP, Podr-1::RFP</i> )<br><i>muEx308</i>                                 |              | 19.9 ± 0.5                  | 89/100                         | +14.3                      | 0.001                |
| CF2148<br>( <i>Ptcer-1::tcer-1::GFP, Podr-1::RFP</i> )<br><i>muEx325</i>                                 |              | 20.5 ± 0.5                  | 71/78                          | +17.8                      | <0.0001              |
| CF2149*<br>( <i>Ptcer-1::tcer-1::GFP, Podr-1::RFP</i> )<br><i>muEx326</i>                                |              | 21.6 ± 0.6                  | 74/79                          | +24.1                      | 0.0002               |
| CF2150<br>( <i>Ptcer-1::tcer-1::GFP, Podr-1::RFP</i> )<br><i>muEx327</i>                                 |              | 20.9 ± 0.5                  | 69/87                          | +20.1                      | <0.0001              |
| CF2151<br>( <i>Ptcer-1::tcer-1::GFP, Podr-1::RFP</i> )<br><i>muEx328</i>                                 |              | 20.3 ± 0.5                  | 82/92                          | +16.6                      | <0.0001              |
|                                                                                                          |              |                             |                                |                            |                      |
| CF2144 (Wild-type Control)                                                                               | 2            | 16.5 ± 0.5                  | 82/87                          |                            |                      |
| CF2148                                                                                                   |              | 20.5 ± 0.7                  | 64/67                          | +24.2                      | <0.0001              |
| CF2149                                                                                                   |              | 18.3 ± 0.8                  | 71/83                          | +10.9                      | 0.03                 |
| CF2150                                                                                                   |              | 18.1 ± 0.6                  | 60/66                          | +9.6                       | 0.05                 |
| CF2151                                                                                                   |              | 17.7 ± 0.6                  | 56/64                          | +7.2                       | 0.17                 |
|                                                                                                          |              |                             |                                |                            |                      |
| N2 (Wild-type control)                                                                                   | 3            | 16.9 ± 0.5                  | 56/68                          |                            |                      |
| CF2031<br>( <i>Ptcer-1::tcer-1::GFP, Podr-1::RFP</i> )<br><i>muEx306</i>                                 |              | 18.8 ± 0.6                  | 84/95                          | +11.2                      | 0.01                 |
| CF2032                                                                                                   |              | 19.4 ± 0.5                  | 84/95                          | +14.7                      | 0.001                |
| CF2033                                                                                                   |              | 19.4 ± 0.6                  | 99/110                         | +14.7                      | 0.001                |
| CF2034<br>( <i>Ptcer-1::tcer-1::GFP, Podr-1::RFP</i> )<br><i>muEx309</i>                                 |              | 17.5 ± 0.6                  | 99/110                         | +3.5                       | 0.32                 |

| Table S2. B: Effect of <i>tcer-1</i> overexpression on lifespan of <i>tcer-1(tm1452)</i> mutants |       |                          |                         |                     |         |             |
|--------------------------------------------------------------------------------------------------|-------|--------------------------|-------------------------|---------------------|---------|-------------|
| Genotype                                                                                         | Trial | Mean LS $\pm$ SEM (days) | Events/Obs <sup>a</sup> | % effect on control | P vs N2 | P vs CF2032 |
| N2                                                                                               | 1     | 18.6 $\pm$ 0.4           | 60/96                   |                     |         |             |
| CF2166<br><i>tcer-1(-)</i> Line #8                                                               |       | 19.1 $\pm$ 0.6           | 50/64                   | +2.6                | 0.28    |             |
| CF2167<br><i>tcer-1(-)</i> Line #9                                                               |       | 19.8 $\pm$ 0.6           | 68/81                   | +6.4                | 0.08    |             |
| CF2032<br>( <i>Ptcer-1::tcer-1::GFP, Podr-1::RFP</i> )                                           |       | 21.5 $\pm$ 0.7           | 76/111                  | +15.5               | 0.0001  |             |
| CF2857<br><i>tcer-1(-); Ptcer-1::tcer-1::GFP, Podr-1::RFP</i><br>Line #16                        |       | 23.8 $\pm$ 0.6           | 96/103                  | +27.9               | <0.0001 | 0.04        |
| CF2858<br><i>tcer-1(-); Ptcer-1::tcer-1::GFP, Podr-1::RFP</i><br>Line #18                        |       | 21.5 $\pm$ 0.6           | 82/93                   | +15.5               | 0.0004  | 0.9         |
|                                                                                                  |       |                          |                         |                     |         |             |
| N2                                                                                               | 2     | 18.5 $\pm$ 0.5           | 94/116                  |                     |         |             |
| CF2166**<br><i>tcer-1(-)</i> Line #8                                                             |       | 18.6 $\pm$ 0.4           | 91/108                  | ne                  | 0.63    |             |
| CF2167<br><i>tcer-1(-)</i> Line #9                                                               |       | 19.4 $\pm$ 0.6           | 91/105                  | +4.8                | 0.1     |             |
| CF2032<br>( <i>Ptcer-1::tcer-1::GFP, Podr-1::RFP</i> )                                           |       | 21.2 $\pm$ 0.5           | 78/112                  | +14.5               | 0.0004  |             |
| CF2857**<br><i>tcer-1(-); Ptcer-1::tcer-1::GFP, Podr-1::RFP</i><br>Line #16                      |       | 24.6 $\pm$ 0.8           | 81/106                  | +32.9               | <0.0001 | 0.0009      |
| CF2858<br><i>tcer-1(-); Ptcer-1::tcer-1::GFP, Podr-1::RFP</i><br>Line #18                        |       | 23.2 $\pm$ 0.8           | 95/114                  | +25.4               | <0.0001 | 0.02        |

| <b>Table S2. C: Effect of <i>tcer-1</i> overexpression on lifespan of long-lived mutants</b> |                             |                                |                                                     |                                   |
|----------------------------------------------------------------------------------------------|-----------------------------|--------------------------------|-----------------------------------------------------|-----------------------------------|
| <b>Genotype</b>                                                                              | <b>Mean LS ± SEM (days)</b> | <b>Events/ Obs<sup>a</sup></b> | <b>P vs. Z2, Z3-ablated or <i>glp-1</i> control</b> | <b>P vs. Intact gonad control</b> |
| CF2032 <sup>#</sup><br><i>tcer-1 OE</i><br>Intact Gonad Control                              | 18.3 ± 0.4                  | 98/115                         |                                                     |                                   |
| CF2032 <sup>#</sup><br><i>tcer-1 OE, Non transgenic siblings</i><br>Intact Gonad Control     | 15.0 ± 0.3                  | 89/107                         |                                                     | <0.0001 (vs CF2032 Intact Gonad)  |
| CF2032 <sup>#</sup><br><i>tcer-1 OE</i><br>Z2, Z3 ablated                                    | 30.9 ± 2.0                  | 29/33                          |                                                     |                                   |
| CF2032 <sup>#</sup><br><i>tcer-1 OE, Non transgenic siblings Z2, Z3 ablated</i>              | 28.2 ± 0.7                  | 20/25                          | 0.96 (vs CF2032 Z2, Z3 Ablated)                     |                                   |
|                                                                                              |                             |                                |                                                     |                                   |
| CF2032<br><i>tcer-1 OE</i><br>Intact Gonad Control                                           | 16.7 ± 0.5                  | 39/46                          |                                                     |                                   |
| CF2032<br><i>tcer-1 OE, Non transgenic siblings</i><br>Intact Gonad Control                  | 15.3 ± 0.4                  | 55/66                          |                                                     | 0.03 (vs CF2032 Intact gonad)     |
| CF2032<br><i>tcer-1 OE</i><br>Z2, Z3 ablated                                                 | 30.6 ± 1.2                  | 92/106                         |                                                     |                                   |
| CF2032<br><i>tcer-1 OE, Non transgenic siblings</i><br>Z2, Z3 ablated                        | 29.7 ± 1.6                  | 107/120                        | 0.76 (vs CF2032 Z2, Z3 ablated)                     |                                   |
|                                                                                              |                             |                                |                                                     |                                   |
| <i>glp-1(-)</i> Control                                                                      | 31.3 ± 0.7                  | 102/103                        |                                                     |                                   |
| CF2175<br><i>glp-1(-); tcer-1 OE muEx307</i><br>Line # 32-10                                 | 33.2 ± 1.1                  | 82/91                          | 0.002                                               |                                   |
| CF2177<br><i>glp-1(-); tcer-1 OE muEx307</i><br>Line # 32-40                                 | 30.7 ± 1.1                  | 88/90                          | 0.11                                                |                                   |
| CF2178<br><i>glp-1(-); tcer-1 OE muEx308</i><br>Line # 33-16                                 | 31.6 ± 1.0                  | 87/90                          | 0.13                                                |                                   |
| CF2179<br><i>glp-1(-); tcer-1 OE muEx308</i><br>Line # 33-10                                 | 31.7 ± 1.1                  | 84/91                          | 0.08                                                |                                   |
| CF2180<br><i>glp-1(-); tcer-1 OE muEx308</i>                                                 | 31.5 ± 0.9                  | 81/84                          | 0.36                                                |                                   |

|                                                                                                |            |         |         |                      |
|------------------------------------------------------------------------------------------------|------------|---------|---------|----------------------|
| <i>Line # 33-17</i>                                                                            |            |         |         |                      |
| <i>glp-1(-)</i> Control <sup>***</sup>                                                         | 30.6 ± 0.2 | 102/104 |         |                      |
| CF2178                                                                                         | 31.8 ± 0.5 | 88/91   | 0.1     |                      |
| CF2178<br><b>Non-transgenic control siblings</b>                                               | 30.8 ± 0.4 | 97/98   | 0.3     | 0.89<br>(vs. CF2178) |
| CF2179 <sup>***</sup>                                                                          | 30.4 ± 0.3 | 82/89   | 0.3     |                      |
| CF2179 <sup>***</sup><br><b>Non-transgenic control siblings</b>                                | 30.6 ± 0.2 | 86/89   | 0.4     | 0.2<br>(vs. CF2179)  |
|                                                                                                |            |         |         |                      |
| <i>daf-2(e1370)</i>                                                                            | 52.4 ± 1.5 | 95/116  |         |                      |
| <i>daf-2(e1370); tcer-1 OE Line#10</i>                                                         | 55.8 ± 1.6 | 77/120  | 0.01    |                      |
|                                                                                                |            |         |         |                      |
| <i>daf-2(e1370); tcer-1 OE Line#10</i> <sup>\$</sup><br><b>Non-transgenic control siblings</b> | 51.2 ± 1.5 | 63/87   |         |                      |
| <i>daf-2(e1370); tcer-1 OE Line#10</i> <sup>\$</sup>                                           | 57.6 ± 1.4 | 74/90   | 0.01    |                      |
|                                                                                                |            |         |         |                      |
| <i>eat-2(ad1116)</i> <sup>\$\$</sup>                                                           | 24.5 ± 0.4 | 34/102  |         |                      |
| <i>eat-2(ad1116); tcer-1 OE</i> <sup>\$\$</sup> Line #1                                        | 30.1 ± 0.9 | 30/60   | 0.001   |                      |
| <i>eat-2(ad1116); tcer-1</i> <sup>\$\$</sup> OE Line #2                                        | 30.9 ± 0.9 | 64/129  | <0.0001 |                      |

LS: Lifespan; SEM: Standard error of the mean

<sup>a</sup> Some animals were censored as described in Materials and Methods.

@ The co-injection marker *Podr-1::RFP* did not have any effect on lifespan (CF2144 vs. N2 P = 0.24)

ne: no effect

\*, \*\*, \*\*\*: Experiments depicted in Figure 3D- F, respectively.

# : Experiments depicted in Figure S2.

\$. \$\$: Experiments depicted in Figure 6E and Figure S5. B, respectively.
