# Supplementary material for: A Transcription Elongation Factor That Links Signals from the Reproductive System to Lifespan Extension in Caenorhabditis elegans
Source: PubMed Central journal article supplement (PMC2729384; doi:10.1371/journal.pgen.1000639), 2009-09-11
Supplement: pgen.1000639.s009.pdf [file pgen.1000639.s009.pdf]

**Table S4: Effect of *daf-16* and *kri-1* mutations on lifespan extension induced by *tcer-1* overexpression.**

| Genotype                                              | Mean LS ± SEM (days) | Events/ Obs <sup>a</sup> | P vs CF2032 | P vs. <i>daf-16</i> (-), <i>kri-1</i> (-) or N2 <sup>#</sup> | P Line 1 vs Line 2 |
|-------------------------------------------------------|----------------------|--------------------------|-------------|--------------------------------------------------------------|--------------------|
| N2*                                                   | 18.4 ± 0.3           | 66/98                    | <0.0001     |                                                              |                    |
| CF2032*<br><i>tcer-1 OE</i>                           | 21.1 ± 0.2           | 79/102                   |             |                                                              |                    |
| CF1037*<br><i>daf-16(mu86)</i>                        | 17.5 ± 0.2           | 65/81                    | <0.0001     | 0.03 <sup>#</sup>                                            |                    |
| CF2432a<br><i>daf-16(mu86); tcer-1 OE</i><br>Line #3  | 17.7 ± 0.4           | 77/96                    | <0.0001     | 0.2                                                          | 0.9                |
| CF2432b*<br><i>daf-16(mu86); tcer-1 OE</i><br>Line #9 | 17.6 ± 0.2           | 89/104                   | <0.0001     | 0.1, 0.5 <sup>#</sup>                                        |                    |
|                                                       |                      |                          |             |                                                              |                    |
| N2                                                    | 16.5 ± 0.3           | 90/138                   | <0.0001     |                                                              |                    |
| CF2032<br><i>tcer-1 OE</i>                            | 20.5 ± 0.4           | 97/130                   |             |                                                              |                    |
| CF1037<br><i>daf-16(mu86)</i>                         | 14.9 ± 0.2           | 103/135                  | <0.0001     | <0.0001 <sup>#</sup>                                         |                    |
| CF2432a<br><i>daf-16(mu86); tcer-1 OE</i><br>Line #3  | 16.9 ± 0.7           | 102/131                  | <0.0001     | 0.6                                                          | 0.2                |
| CF2432b<br><i>daf-16(mu86); tcer-1 OE</i><br>Line #9  | 16.1 ± 0.1           | 90/129                   | <0.0001     | 0.02, 0.2 <sup>#</sup>                                       |                    |
|                                                       |                      |                          |             |                                                              |                    |
| N2                                                    | 21.1 ± 0.2           | 88/136                   | 0.24        |                                                              |                    |
| CF2032<br><i>tcer-1 OE</i>                            | 22.4 ± 0.2           | 72/127                   |             |                                                              |                    |
| CF1037<br><i>daf-16(mu86)</i>                         | 15.6 ± 0.3           | 88/128                   | <0.0001     | <0.0001 <sup>#</sup>                                         |                    |
| CF2432a<br><i>daf-16(mu86); tcer-1 OE</i><br>Line #3  | 16.6 ± 0.2           | 85/135                   | <0.0001     | 0.4                                                          | 0.2                |
| CF2432b<br><i>daf-16(mu86); tcer-1 OE</i><br>Line #9  | 17.6 ± 0.4           | 89/12                    | <0.0001     | 0.001                                                        |                    |
|                                                       |                      |                          |             |                                                              |                    |
| N2**                                                  | 16.5 ± 0.3           | 90/138                   | <0.0001     |                                                              |                    |
| CF2032**<br><i>tcer-1 OE</i>                          | 20.5 ± 0.4           | 97/130                   |             |                                                              |                    |

|                                                        |            |         |         |                       |      |
|--------------------------------------------------------|------------|---------|---------|-----------------------|------|
| CF2052**<br><i>kri-1(ok1251)</i>                       | 15.9 ± 0.2 | 69/135  | <0.0001 | 0.19 <sup>#</sup>     |      |
| CF2466**<br><i>kri-1(ok1251); tcer-1 OE</i><br>Line #1 | 16.0 ± 0.5 | 79/128  | <0.0001 | 0.4, 0.5 <sup>#</sup> | 0.4  |
| CF2466b<br><i>kri-1(ok1251); tcer-1 OE</i><br>Line #2  | 17.1 ± 0.4 | 74/136  | <0.0001 | 0.6                   |      |
|                                                        |            |         |         |                       |      |
| N2                                                     | 21.1 ± 0.2 | 88/136  | 0.24    |                       |      |
| CF2032<br><i>tcer-1 OE</i>                             | 22.4 ± 0.2 | 72/127  |         |                       |      |
| CF2052<br><i>kri-1(ok1251)</i>                         | 16.1 ± 0.2 | 61/128  | <0.0001 | <0.0001 <sup>#</sup>  |      |
| CF2466a<br><i>kri-1(ok1251); tcer-1 OE</i><br>Line #1  | 16.8 ± 0.3 | 96/130  | <0.0001 | 0.8                   | 0.09 |
| CF2466b<br><i>kri-1(ok1251); tcer-1 OE</i><br>Line #2  | 15.9 ± 0.2 | 88/128  | <0.0001 | 0.3                   |      |
|                                                        |            |         |         |                       |      |
| N2                                                     | 18.5 ± 0.1 | 61/96   | 0.0001  |                       |      |
| CF2032<br><i>tcer-1 OE</i>                             | 21.5 ± 0.2 | 76/111  |         |                       |      |
| CF2466a<br><i>kri-1(ok1251); tcer-1 OE</i><br>Line #1  | 16.6 ± 0.3 | 102/120 | <0.0001 | 0.13 <sup>#</sup>     | 0.4  |
| CF2466a<br>Non-transgenic control<br>siblings          | 16.4 ± 0.4 | 91/114  | <0.0001 | 0.03 <sup>#</sup>     |      |
| CF2466b<br><i>kri-1(ok1251); tcer-1 OE</i><br>Line #2  | 16.9 ± 0.4 | 103/115 | <0.0001 | 0.2 <sup>#</sup>      | 0.7  |
| CF2466b<br>Non-transgenic control<br>siblings          | 16.7 ± 0.6 | 94/117  | <0.0001 | 0.1                   |      |
|                                                        |            |         |         |                       |      |
| N2                                                     | 18.5 ± 0.3 | 94/116  | 0.0005  |                       |      |
| CF2032<br><i>tcer-1 OE</i>                             | 21.1 ± 0.2 | 83/116  |         |                       |      |
| CF2466a<br><i>kri-1(ok1251); tcer-1 OE</i><br>Line #1  | 17.9 ± 0.7 | 106/118 | 0.0001  | 0.13 <sup>#</sup>     | 0.9  |

|                                                              |             |        |         |                   |     |
|--------------------------------------------------------------|-------------|--------|---------|-------------------|-----|
| CF2466a<br>Non-transgenic control<br>siblings                | 18.3 ± 0.4  | 93/120 | 0.0008  | 0.03 <sup>#</sup> |     |
| CF2466b<br><i>kri-1(ok1251); tcer-1 OE</i><br><i>Line #2</i> | 18.4 ± 0.6  | 91/116 | 0.001   | 0.7 <sup>#</sup>  | 0.6 |
| CF2466b<br>Non-transgenic control<br>siblings                | 18.5 ± 0.04 | 93/114 | <0.0001 | 0.8 <sup>#</sup>  |     |

LS: Lifespan; SEM: Standard error of the mean.

<sup>a</sup> Some animals were censored as described in Materials and Methods.

<sup>\*</sup>, <sup>\*\*</sup> Experiments depicted in Figures 5B and 7G, respectively.
