# Supplementary material for: A Transcription Elongation Factor That Links Signals from the Reproductive System to Lifespan Extension in Caenorhabditis elegans
Source: PubMed Central journal article supplement (PMC2729384; doi:10.1371/journal.pgen.1000639), 2009-09-11
Supplement: pgen.1000639.s010.pdf [file pgen.1000639.s010.pdf]

**Table S5: Effect of *tcer-1* reduction of function on the extended lifespans of other longevity mutants.**

| Genotype                            | RNAi treatment (if applicable) | Trial           | Mean LS $\pm$ SEM (days) | Events/ Obs <sup>a</sup> | % of RNAi control lifespan <sup>b</sup> | P vs. control |
|-------------------------------------|--------------------------------|-----------------|--------------------------|--------------------------|-----------------------------------------|---------------|
| <i>daf-2(e1370)</i>                 | Control                        | 1**             | 45.6 $\pm$ 1.5           | 58/77                    |                                         |               |
|                                     | <i>tcer-1</i>                  |                 | 47.5 $\pm$ 2.0           | 45/63                    | 104.1                                   | 0.12          |
|                                     | <i>daf-16</i>                  |                 | 16.2 $\pm$ 0.1           | 45/73                    | 35.5                                    | <0.0001       |
|                                     | Control                        | 2               | 43.9 $\pm$ 1.9           | 59/90                    |                                         |               |
|                                     | <i>tcer-1</i>                  |                 | 38.3 $\pm$ 0.5           | 53/84                    | 87.2                                    | 0.3           |
|                                     | <i>daf-16</i>                  |                 | 20.7 $\pm$ 0.5           | 79/80                    | 47.1                                    | <0.0001       |
| <i>daf-2(e1368)</i>                 | Control                        | 1**             | 31.0 $\pm$ 1.3           | 47/76                    |                                         |               |
|                                     | <i>tcer-1</i>                  |                 | 32.0 $\pm$ 0.8           | 41/75                    | 103.2                                   | 0.54          |
|                                     | <i>daf-16</i>                  |                 | 19.7 $\pm$ 0.4           | 35/69                    | 63.5                                    | <0.0001       |
|                                     | Control                        | 2               | 28.9 $\pm$ 0.6           | 57/91                    |                                         |               |
|                                     | <i>tcer-1</i>                  |                 | 27.4 $\pm$ 0.7           | 57/90                    | 94.8                                    | 0.95          |
|                                     | <i>daf-16</i>                  |                 | 20.0 $\pm$ 0.2           | 58/90                    | 69.2                                    | <0.0001       |
| <i>daf-2(mu150)</i>                 | Control                        | 1               | 29.9 $\pm$ 0.7           | 78/105                   |                                         |               |
|                                     | <i>tcer-1</i>                  |                 | 29.3 $\pm$ 0.6           | 88/105                   | 97.9                                    | 0.28          |
|                                     | <i>daf-16</i>                  |                 | 16.1 $\pm$ 0.4           | 73/105                   | 53.8                                    | <0.0001       |
| <i>eat-2(ad1116)</i>                | Control                        | 1               | 26.1 $\pm$ 0.3           | 79/87                    |                                         |               |
|                                     | <i>tcer-1</i>                  |                 | 29.0 $\pm$ 0.5           | 79/88                    | 111.1                                   | <0.0001       |
|                                     | <i>daf-16</i>                  |                 | 24.6 $\pm$ 0.5           | 67/85                    | 94.2                                    | 0.08          |
|                                     | Control                        | 2               | 27.1 $\pm$ 1.1           | 57/91                    |                                         |               |
|                                     | <i>tcer-1</i>                  |                 | 25.7 $\pm$ 0.8           | 64/95                    | 94.8                                    | 0.2           |
|                                     | Control                        | 3 <sup>##</sup> | 26.5 $\pm$ 0.4           | 59/72                    |                                         |               |
|                                     | <i>tcer-1</i>                  |                 | 27.2 $\pm$ 0.5           | 40/71                    | 102.6                                   | 0.2           |
| <i>isp-1(qm150)</i>                 | Control                        | 1 <sup>#</sup>  | 24.1 $\pm$ 0.5           | 39/91                    |                                         |               |
|                                     | <i>tcer-1</i>                  |                 | 26.1 $\pm$ 0.5           | 52/90                    | 108.2                                   | 0.0005        |
|                                     | <i>daf-16</i>                  |                 | 19.7 $\pm$ 0.5           | 55/90                    | 81.7                                    | 0.05          |
| <i>daf-2(e1370)</i>                 |                                | 1*              | 47.2 $\pm$ 0.7           | 91/103                   |                                         |               |
| <i>tcer-1(tm1452); daf-2(e1370)</i> |                                |                 | 46.6 $\pm$ 0.6           | 58/102                   | 98.7                                    | 0.43          |
| <i>daf-2(e1370)</i>                 |                                | 2               | 41.6 $\pm$ 0.5           | 92/120                   |                                         |               |

|                                     |    |            |        |       |     |
|-------------------------------------|----|------------|--------|-------|-----|
| <i>tcer-1(tm1452); daf-2(e1370)</i> |    | 42.5 ± 0.4 | 70/126 | 102.1 | 0.2 |
|                                     |    |            |        |       |     |
| <i>daf-2(e1368)</i>                 | 1* | 33.1 ± 0.4 | 75/103 |       |     |
| <i>tcer-1(tm1452); daf-2(e1368)</i> |    | 31.3 ± 1.8 | 57/100 | 94.5  | 0.1 |
| N2                                  |    | 16.7 ± 0.1 | 70/113 |       |     |
|                                     |    |            |        |       |     |
| <i>daf-2(e1368)</i>                 | 2  | 26.6 ± 0.7 | 91/132 |       |     |
| <i>tcer-1(tm1452); daf-2(e1368)</i> |    | 23.3 ± 0.5 | 75/136 | 87.5  | 0.2 |
|                                     |    |            |        |       |     |

LS: Lifespan; SEM: Standard error of the mean.

<sup>a</sup> Some animals were censored as described in Materials and Methods.

<sup>b</sup> Control refers to worms exposed to empty vector plasmid without an RNAi insert (in RNAi experiments).

\*, \*\*, #, ## Experiments depicted in Figures 6A, B, F and G, respectively.
