# Supplementary material for: A Transcription Elongation Factor That Links Signals from the Reproductive System to Lifespan Extension in Caenorhabditis elegans
Source: PubMed Central journal article supplement (PMC2729384; doi:10.1371/journal.pgen.1000639), 2009-09-11
Supplement: pgen.1000639.s011.pdf [file pgen.1000639.s011.pdf]

**Table S6: Strains generated for, and used in this study.**

| No. | Strain | Genotype                                                                          | Comments                                                                                                                       |
|-----|--------|-----------------------------------------------------------------------------------|--------------------------------------------------------------------------------------------------------------------------------|
| 1   | CF2166 | <i>tcer-1(tm1452)II</i> Line #8                                                   |                                                                                                                                |
| 2   | CF2167 | <i>tcer-1(tm1452)II</i> Line #9                                                   | Used for all crosses                                                                                                           |
| 3   | CF2152 | <i>tcer-1(tm1452)II; glp-1(e2141ts)III</i><br>Line #1.1-11.5                      |                                                                                                                                |
| 4   | CF2153 | <i>tcer-1(tm1452)II; glp-1(e2141ts)III</i><br>Line #1.1-4.5                       |                                                                                                                                |
| 5   | CF2154 | <i>tcer-1(tm1452)II; glp-1(e2141ts)III</i><br>Line #1.1-11.1                      | Used to cross DAF-16-target gene reporters and <i>tcer-1 OE</i> into <i>tcer-1</i> ; <i>glp-1</i> and <i>glp-1</i> backgrounds |
| 6   | CF2155 | <i>tcer-1(tm1452)II; glp-1(e2141ts)III</i><br>Line #14.1-12.5                     |                                                                                                                                |
| 7   | CF2144 | <i>muEx321 (Podr-1::rfp)</i> Line II5-6-5                                         | 75ng/μl injected into N2                                                                                                       |
| 8   | CF2145 | <i>muEx322 (Podr-1::rfp)</i> Line II5-6-6                                         | 75ng/μl injected into N2                                                                                                       |
| 9   | CF2031 | <i>muEx306 (Ptcer-1::tcer-1::gfp, Podr-1::rfp)</i>                                | <i>tcer-1</i> : 50ng/μl and <i>odr-1</i> 75ng/μl injected into N2                                                              |
| 10  | CF2032 | <i>muEx307 (Ptcer-1::tcer-1::gfp, Podr-1::rfp)</i>                                | Concentrations same as CF2031; Used for all ablations, <i>tcer-1 OE</i> experiments and crosses                                |
| 11  | CF2033 | <i>muEx308 (Ptcer-1::tcer-1::gfp, Podr-1::rfp)</i>                                | Same as CF2031                                                                                                                 |
| 12  | CF2034 | <i>muEx309 (Ptcer-1::tcer-1::gfp, Podr-1::rfp)</i>                                | Same as CF2031                                                                                                                 |
| 13  | CF2148 | <i>muEx325 (Ptcer-1::tcer-1::gfp, Podr-1::rfp)</i><br>Line #I16-2-1               | <i>tcer-1</i> : 20ng/μl and <i>odr-1</i> 75ng/μl injected into N2                                                              |
| 14  | CF2149 | <i>muEx326 (Ptcer-1::tcer-1::gfp, Podr-1::rfp)</i><br>Line #I16-2-5               | --do--                                                                                                                         |
| 15  | CF2150 | <i>muEx327 (Ptcer-1::tcer-1::gfp, Podr-1::rfp)</i><br>Line #I16-1-5               | --do--                                                                                                                         |
| 16  | CF2151 | <i>muEx328 (Ptcer-1::tcer-1::gfp, Podr-1::rfp)</i><br>Line #I16-1-1               | --do--                                                                                                                         |
| 17  | CF2168 | <i>tcer-1(tm1452)II; daf-2(e1370)III</i>                                          |                                                                                                                                |
| 18  | CF2169 | <i>tcer-1(tm1452)II; daf-2(e1378)III</i>                                          |                                                                                                                                |
| 19  | CF2175 | <i>glp-1(e2141ts)III; muEx307 (Ptcer-1::tcer-1::gfp, Podr-1::rfp)</i> Line #32-10 |                                                                                                                                |
| 20  | CF2176 | <i>glp-1(e2141ts)III; muEx307 (Ptcer-1::tcer-1::gfp, Podr-1::rfp)</i> Line #32-36 |                                                                                                                                |
| 21  | CF2177 | <i>glp-1(e2141ts)III; muEx307 (Ptcer-1::tcer-1::gfp, Podr-1::rfp)</i> Line #32-40 |                                                                                                                                |
| 22  | CF2178 | <i>glp-1(e2141ts)III; muEx308 (Ptcer-1::tcer-1::gfp, Podr-1::rfp)</i> Line #33-16 |                                                                                                                                |
| 23  | CF2179 | <i>glp-1(e2141ts)III; muEx308 (Ptcer-1::tcer-1::gfp, Podr-1::rfp)</i> Line #33-10 |                                                                                                                                |

|    |         |                                                                                             |  |
|----|---------|---------------------------------------------------------------------------------------------|--|
| 24 | CF2180  | <i>glp-1(e2141ts)III; muEx308 (Ptcer-1::tcer-1::gfp, Podr-1::rfp) Line #33-17</i>           |  |
| 25 | CF2432a | <i>daf-16(mu86)I; muEx307 (Ptcer-1::tcer-1::gfp, Podr-1::rfp) Line #3</i>                   |  |
| 26 | CF2432b | <i>daf-16(mu86)I; muEx307 (Ptcer-1::tcer-1::gfp, Podr-1::rfp) Line #9</i>                   |  |
| 27 | CF2466a | <i>kri-1(ok1251)I; muEx307 (Ptcer-1::tcer-1::gfp, Podr-1::rfp) Line #1</i>                  |  |
| 28 | CF2466b | <i>kri-1(ok1251)I; muEx307 (Ptcer-1::tcer-1::gfp, Podr-1::rfp) Line #2</i>                  |  |
| 29 | CF2857  | <i>tcer-1(tm1452)II; muEx307 (Ptcer-1::tcer-1::gfp, Podr-1::rfp) Line #16</i>               |  |
| 30 | CF2858  | <i>tcer-1(tm1452)II; muEx307 (Ptcer-1::tcer-1::gfp, Podr-1::RFP) Line# 18</i>               |  |
| 31 | CF2859a | <i>tcer-1(tm1452)II; glp-1(e2141ts)III (Ptcer-1::tcer-1::gfp, Podr-1::rfp) Line #24</i>     |  |
| 32 | CF2859b | <i>tcer-1(tm1452)II; glp-1(e2141ts)III (Ptcer-1::tcer-1::gfp, Podr-1::rfp) Line #81</i>     |  |
| 33 | CF2859c | <i>tcer-1(tm1452)II; glp-1(e2141ts)III (Ptcer-1::tcer-1::gfp, Podr-1::rfp) Line #91</i>     |  |
| 34 | CF2860  | <i>daf-2(e1370)III; muEx307 (Ptcer-1::tcer-1::gfp, Podr-1::rfp) Line #10</i>                |  |
| 35 | CF3025a | <i>eat-2(ad1116)II muEx307 (Ptcer-1::tcer-1::gfp, Podr-1::rfp) Line #1</i>                  |  |
| 36 | CF3025b | <i>eat-2(ad1116)II muEx307 (Ptcer-1::tcer-1::gfp, Podr-1::rfp) Line #2</i>                  |  |
| 37 | CF3124  | <i>glp-1(e2141ts)III; Pgp-2::gfp Line# 4</i>                                                |  |
| 38 | CF3125a | <i>tcer-1(tm1452)II; glp-1(e2141ts)III; Pgp-2::gfp Line #6</i>                              |  |
| 39 | CF3197a | <i>glp-1(e2141ts)III; sEx14344 (rCesK07B1.4::gfp + pCeh361) Line #3</i>                     |  |
| 40 | CF3198a | <i>tcer-1(tm1452)II; glp-1(e2141ts)III; sEx14344 (rCesK07B1.4::gfp + pCeh361) Line #36</i>  |  |
| 41 | CF3201a | <i>glp-1(e2141ts)III; sEx10466 (rCesC15H9.1::gfp + pCeh361) Line #28</i>                    |  |
| 42 | CF3202a | <i>tcer-1(tm1452)II; glp-1(e2141ts)III; sEx10466 (rCesC15H9.1::gfp + pCeh361) Line #7</i>   |  |
| 43 | CF3204  | <i>glp-1(e2141ts)III; sEx14516 (rCesT21D12.9::gfp + pCeh361) Line #10</i>                   |  |
| 44 | CF3229  | <i>tcer-1(tm1452)II; glp-1(e2141ts)III; sEx14516 (rCesT21D12.9::gfp + pCeh361) Line #68</i> |  |

|                                                                    |         |                                                                                                       |                                    |
|--------------------------------------------------------------------|---------|-------------------------------------------------------------------------------------------------------|------------------------------------|
| 45                                                                 | CF3250  | <i>glp-1(e2141ts)III; sEx15603 (rCesF52H3.5::gfp + pCeh361) Line #10</i>                              |                                    |
| 46                                                                 |         | <i>tcer-1(tm1452)II; glp-1(e2141ts)III; sEx15603 (rCesT21D12.9::gfp + pCeh361) Line #17</i>           |                                    |
| 47                                                                 | CF2352  | <i>tcer-1(tm1452)II; glp-1(e2141ts)III; Pdod-8::gfp</i>                                               |                                    |
| 48                                                                 | CF3253a | <i>tcer-1(tm1452)II; glp-1(e2141ts)III Psod-3::gfp Line #52</i>                                       |                                    |
| 49                                                                 |         | <i>daf-16(mu86)I; tcer-1(tm1452)II; glp-1(e2141ts)III; mulS109(Pdaf-16::daf-16::gfp, Podr-1::rfp)</i> |                                    |
| <b>Strains Obtained from the CGC or David Baillie's laboratory</b> |         |                                                                                                       |                                    |
| 50                                                                 | BC11128 | <i>dpy-5(e907)I; sEx11128 (rCesK10B3.8::gfp + pCeh361)</i>                                            |                                    |
| 51                                                                 | BC14344 | <i>dpy-5(e907)I; sEx11128 (rCesK07B1.4::gfp + pCeh361)</i>                                            |                                    |
| 52                                                                 | BC10466 | <i>dpy-5(e907)I; sEx10466 (rCesC15H9.1::gfp + pCeh361)</i>                                            |                                    |
| 53                                                                 | BC14516 | <i>dpy-5(e907)I; sEx14516 (rCesT21D12.9::gfp + pCeh361)</i>                                           |                                    |
| 54                                                                 | BC15603 | <i>dpy-5(e907)I; sEx15603 (rCesF52H3.5::gfp + pCeh361)</i>                                            |                                    |
| <b>Other strains</b>                                               |         |                                                                                                       |                                    |
| 55                                                                 | CF1903  | <i>glp-1(e2141ts)III</i>                                                                              | outcrossed thrice to Kenyon lab N2 |
| 56                                                                 |         | <i>glp-1(e2141ts)III</i>                                                                              |                                    |
| 57                                                                 | CF1908  | <i>eat-2(ad1116)II</i>                                                                                | outcrossed thrice to Kenyon lab N2 |
| 58                                                                 | DA1116  | <i>eat-2(ad1116)II</i>                                                                                |                                    |
| 59                                                                 | CF1041  | <i>daf-2(e1370)III</i>                                                                                |                                    |
| 60                                                                 | DR1572  | <i>daf-2(e1368)III</i>                                                                                |                                    |
| 61                                                                 | CF1844  | <i>fer-15(b26)II; daf-2(mu150); fem-1(hc17)IV</i>                                                     |                                    |
| 62                                                                 | MQ887   | <i>isp-1(qm150)IV</i>                                                                                 |                                    |
| 63                                                                 | CF2050  | <i>kri-1(ok1251)I</i>                                                                                 |                                    |
| 64                                                                 | CF1037  | <i>daf-16(mu86)I</i>                                                                                  |                                    |
| 65                                                                 | CF2630  | <i>sIs10314 (Pdod-8::gfp + PCeh361)</i>                                                               | BC12544 crossed to N2              |
| 66                                                                 | CF2573  | <i>glp-1(e2141ts)III; sIs10314 (Pdod-8::gfp)</i>                                                      |                                    |
| 67                                                                 | CF2790  | <i>daf-2(e1370)III; sIs10314 (Pdod-8::gfp)</i>                                                        |                                    |
| 68                                                                 | CF1935  | <i>daf-16(mu86)I; glp-1(e2141)III; mulS109 (Pdof-16::daf-16::gfp, Podr-1::rfp)</i>                    |                                    |
| 69                                                                 | CF1929  | <i>glp-1(e2141ts)III; mulS84 (Psod-3::gfp)</i>                                                        |                                    |
