# Supplementary material for: A Transcription Elongation Factor That Links Signals from the Reproductive System to Lifespan Extension in Caenorhabditis elegans
Source: PubMed Central journal article supplement (PMC2729384; doi:10.1371/journal.pgen.1000639), 2009-09-11
Supplement: pgen.1000639.s012.pdf [file pgen.1000639.s012.pdf]

**Table S7: Q-PCR primers used in this study.**

| Gene             | Forward                                  | Reverse                                 |
|------------------|------------------------------------------|-----------------------------------------|
| <i>tcer-1</i>    | 5' GAT CAT ATT GAA AAC TTG GGC CGC 3'    | 5' TTA TTG CTT TCT GCG ATC CCG CTC 3'   |
| <i>dod-8</i>     | 5' ACA GGA TGT CTT CAA AAG GAA TAT GG 3' | 5' TTG CTG GGG TGA TAG CTT GG 3'        |
| <i>sod-3</i>     | 5' CTA AGG ATG GTG AAC CTT CA 3'         | 5' CGC GCT TAA TAG TGT CCA TCA G 3'     |
| <i>sod-3</i>     | 5' AAA GGA GCT GAT GGA CAC TAT TAA GC 3' | 5' AAG TTA TCC AGG GAA CCG AAG TC 3'    |
| <i>gpd-2</i>     | 5' AAG GCC AAC GCT CAC TTG AA 3'         | 5' GGT TGA CTC CGA CGA CGA AC 3'        |
| <i>nnt-1</i>     | 5' CAG TAG AAA CTG CTG ACA TGC TTC 3'    | 5' GAG CGA TGG GAT ATT GTG CCT GAG 3'   |
| <i>K07B1.4</i>   | 5' GGT CTT CTT CCA TTC AGA AAA CC 3'     | 5' TGT ATG TCT GAT GAA GTG TGT CG 3'    |
| <i>T21D12.9</i>  | 5' CAT CTA AAT CTA TCA ACT AAT AGA G 3'  | 5' GTA GGA CAG GTC CAA AAC TTC CAA G 3' |
| <i>pssy-1</i>    | 5' GGA ATG ATT TCG ATT GGG GAT CC 3'     | 5' TGT GTT CAG CTC GGT TAG CAA CC 3'    |
| <i>F52H3.5</i>   | 5' GAA GTT TAC AAA AGC ACT CGA AG 3'     | 5' GGT TTA TTT TGA AGT CGG TAT GC 3'    |
| <i>aat-1</i>     | 5' CCC AAA ACG AAA CCT TCC ACT CGC 3'    | 5' TGA AAT TGC TGT GTA GAG AGC CAC 3'   |
| <i>daf-16</i>    | 5' ATC CAA TTG TGC CAA GCA CTA A 3'      | 5' CCA CCA TTT TGA TAG TTT CCA TAG G 3' |
| <i>hsf-1</i>     | 5' GAA TGC GAC TAG GCA AAT GGC 3'        | 5' GGT GGA TGA GGT GGA AGT CG 3'        |
| <i>daf-9</i>     | 5' GTG ACC CAC TTG CTG GAG CG 3'         | 5' CGT CCA CTT GCG GAG AAT GCC 3'       |
| <i>daf-12</i>    | 5' CGG ATT CCA AAA GCA CTG GG 3'         | 5' CTC CTG GCA GCT CTT CGG 3'           |
| <i>act-1</i>     | 5' CTA CGA ACT TCC TGA CGG ACA AG 3'     | 5' CCG GCG GAC TCC ATA CC 3'            |
| <i>ama-1</i>     | 5' TGG AAC TCT GGA GTC ACA CC 3'         | 5' CAT CCT CCT TCA TTG AAC GG 3'        |
| <i>csq-1</i>     | 5' AAC TGA GGT TCT GAC CGA GAA G 3'      | 5' TAC TGG TCA AGC TCT GAG TCG TC 3'    |
| <i>pmp-3</i>     | 5' GTT CCC GTG TTC ATC ACT CAT 3'        | 5' ACA CCG TCG AGA AGC TGT AGA 3'       |
| <i>nhr-23</i>    | 5' CAG AAA CAC TGA AGA ACG CG 3'         | 5' CGA TCT GCA GTG AAT AGC TC 3'        |
| <i>Y45F10D.4</i> | 5' GTC GCT TCA AAT CAG TTC AGC 3'        | 5' GTT CTT GTC AAG TGA TCC GAC A 3'     |
