# Supplementary material for: A Transcription Elongation Factor That Links Signals from the Reproductive System to Lifespan Extension in Caenorhabditis elegans
Source: PLoS Genet. 2009 Sep 11;5(9):e1000639. doi: 10.1371/journal.pgen.1000639 (PMC2729384; doi:10.1371/journal.pgen.1000639)
Supplement: Table S1 — Effect of tcer-1 RNAi and mutation on the lifespans of glp-1 mutants and wild-type worms. (0.15 MB PDF) [file pgen.1000639.s006.pdf]

**Table S1: Effects of *tcer-1* reduction of function on the lifespan of wild-type worms and long-lived *glp-1* mutants.**

| Table S1. A: Effects of <i>tcer-1</i> RNAi on lifespan |                   |                   |                          |                          |                       |                                 |                          |
|--------------------------------------------------------|-------------------|-------------------|--------------------------|--------------------------|-----------------------|---------------------------------|--------------------------|
| Genotype                                               | RNAi treatment    | Trial             | Mean LS $\pm$ SEM (days) | Events/ Obs <sup>a</sup> | % of control lifespan | P vs. RNAi control <sup>b</sup> | P vs. <i>daf-16</i> RNAi |
| <i>glp-1(-)</i>                                        | Control           | 1                 | 23.7 $\pm$ 0.7           | 84/89                    |                       |                                 |                          |
|                                                        | <i>tcer-1</i>     |                   | 16.3 $\pm$ 0.4           | 80/90                    | -31.2                 | <0.0001                         |                          |
|                                                        | <i>daf-16</i>     |                   | 15.3 $\pm$ 0.3           | 88/92                    | -35.4                 | <0.0001                         |                          |
|                                                        |                   |                   |                          |                          |                       |                                 |                          |
|                                                        | Control           | 2*, <sup>\$</sup> | 27.0 $\pm$ 1.1           | 112/114                  |                       |                                 |                          |
|                                                        | <i>tcer-1</i>     |                   | 18.5 $\pm$ 0.3           | 119/122                  | -31.4                 | <0.0001                         | <0.0001                  |
|                                                        | <i>tcer-1(MV)</i> |                   | 18.1 $\pm$ 0.4           | 96/114                   | -32.2                 | <0.0001                         | <0.0001                  |
|                                                        | <i>daf-16</i>     |                   | 15.2 $\pm$ 0.2           | 110/113                  | -43.7                 | <0.0001                         |                          |
|                                                        | Control           | 3                 | 24.5 $\pm$ 0.7           | 112/114                  |                       |                                 |                          |
|                                                        | <i>tcer-1</i>     |                   | 19.9 $\pm$ 0.4           | 96/109                   | -18.7                 | <0.0001                         | <0.0001                  |
|                                                        | <i>tcer-1(MV)</i> |                   | 18.2 $\pm$ 0.4           | 103/124                  | -25.7                 | <0.0001                         | 0.02                     |
|                                                        | <i>daf-16</i>     |                   | 16.9 $\pm$ 0.4           | 61/67                    | -31.0                 | <0.0001                         |                          |
|                                                        | Control           | 4                 | 20.0 $\pm$ 0.7           | 98/105                   |                       |                                 |                          |
|                                                        | <i>tcer-1</i>     |                   | 13.9 $\pm$ 0.2           | 102/105                  | -30.5                 | <0.0001                         | 0.04                     |
|                                                        | <i>daf-16</i>     |                   | 12.9 $\pm$ 0.3           | 98/105                   | -35.5                 | <0.0001                         |                          |
|                                                        |                   |                   |                          |                          |                       |                                 |                          |
|                                                        | Control           | 5 <sup>\$\$</sup> | 23.6 $\pm$ 1.0           | 83/95                    |                       |                                 |                          |
|                                                        | <i>tcer-1</i>     |                   | 18.1 $\pm$ 0.5           | 101/102                  | -23.3                 | <0.0001                         | <0.0001                  |
|                                                        | <i>tcer-1(MV)</i> |                   | 17.7 $\pm$ 0.5           | 56/98                    | -25.0                 | <0.0001                         | <0.0001                  |
|                                                        | <i>daf-16</i>     |                   | 14.2 $\pm$ 0.2           | 86/89                    | -39.8                 | <0.0001                         |                          |
|                                                        | Control           | 6                 | 21.7 $\pm$ 1.0           | 86/90                    |                       |                                 |                          |
|                                                        | <i>tcer-1</i>     |                   | 18.2 $\pm$ 0.5           | 71/72                    | -16.1                 | <0.0001                         | <0.0001                  |
|                                                        | <i>daf-16</i>     |                   | 15.3 $\pm$ 0.3           | 87/89                    | -29.4                 | <0.0001                         |                          |
|                                                        |                   |                   |                          |                          |                       |                                 |                          |
|                                                        | Control           | 7                 | 19.8 $\pm$ 1.2           | 78/84                    |                       |                                 |                          |
|                                                        | <i>tcer-1</i>     |                   | 15.1 $\pm$ 0.5           | 71/72                    | -23.7                 | <0.0001                         | <0.0001                  |
|                                                        | <i>daf-16</i>     |                   | 12.9 $\pm$ 0.4           | 41/72                    | -34.8                 | <0.0001                         |                          |
|                                                        |                   |                   |                          |                          |                       |                                 |                          |
|                                                        | Control           | 8                 | 21.4 $\pm$ 0.9           | 79/83                    |                       |                                 |                          |
|                                                        | <i>tcer-1</i>     |                   | 18.2 $\pm$ 0.3           | 86/90                    | -14.9                 | <0.0001                         | <0.0001                  |
|                                                        | <i>daf-16</i>     |                   | 15.3 $\pm$ 0.3           | 87/89                    | -28.5                 | <0.0001                         |                          |

|    |               |                      |            |        |       |         |        |
|----|---------------|----------------------|------------|--------|-------|---------|--------|
| N2 | Control       | 1 <sup>**</sup> , \$ | 19.9 ± 0.6 | 49/72  |       |         |        |
|    | <i>tcer-1</i> |                      | 18.7 ± 0.5 | 66/72  | -6.0  | 0.2     | 0.002  |
|    | <i>daf-16</i> |                      | 16.7 ± 0.5 | 62/72  | -16.0 | <0.0001 |        |
|    | Control*      | 2                    | 19.5 ± 0.3 | 81/99  |       |         |        |
|    | <i>tcer-1</i> |                      | 19.0 ± 0.4 | 49/90  | -2.6  | 0.25    | 0.0001 |
|    | <i>daf-16</i> |                      | 16.7 ± 0.3 | 76/88  | -14.4 | <0.0001 |        |
|    | Control       | 4                    | 20.8 ± 0.6 | 80/112 |       |         |        |
|    | <i>tcer-1</i> |                      | 19.1 ± 0.6 | 87/105 | -3.6  | 0.07    | 0.001  |
|    | <i>daf-16</i> |                      | 17.0 ± 0.4 | 74/112 | -18.2 | <0.0001 |        |
|    | Control       | 5 <sup>\$\$</sup>    | 19.5 ± 0.5 | 70/92  |       |         |        |
|    | <i>tcer-1</i> |                      | 17.2 ± 0.4 | 77/90  | -11.7 | <0.0001 |        |
|    | <i>daf-16</i> |                      | 16.7 ± 0.4 | 76/89  | -14.3 | <0.0001 | 0.63   |

| Table S1. B: Effect of <i>tcer-1(-)</i> on lifespan of <i>glp-1(-)</i> mutants |                     |                      |                          |                                       |                       |
|--------------------------------------------------------------------------------|---------------------|----------------------|--------------------------|---------------------------------------|-----------------------|
| Genotype                                                                       | Trial               | Mean LS ± SEM (days) | Events/ Obs <sup>a</sup> | % of <i>glp-1(-)</i> control lifespan | P vs. <i>glp-1(-)</i> |
| <i>glp-1(-)</i>                                                                | 1                   | 31.1 ± 0.7           | 204/241                  |                                       |                       |
| CF2152<br><i>tcer-1(-); glp-1(-)</i> Line# 1.1-11.5                            |                     | 25.6 ± 0.9           | 94/120                   | -17.6                                 | <0.0001               |
| CF2153<br><i>tcer-1(-); glp-1(-)</i> Line# 1.1-4.5                             |                     | 28.0 ± 0.9           | 105/120                  | -9.9                                  | 0.001                 |
| CF2154<br><i>tcer-1(-); glp-1(-)</i> Line# 1.1-11.1                            |                     | 23.7 ± 0.9           | 81/119                   | -23.7                                 | <0.0001               |
| CF2155<br><i>tcer-1(-); glp-1(-)</i> Line# 14.1-12.5                           |                     | 27.0 ± 0.9           | 96/120                   | -13.1                                 | <0.0001               |
| <i>glp-1(-)</i> ***                                                            | 2 <sup>\$\$\$</sup> | 32.9 ± 0.3           | 233/258                  |                                       |                       |
| CF2152                                                                         |                     | 23.9 ± 0.9           | 90/120                   | -28.0                                 | <0.0001               |
| CF2153                                                                         |                     | 31.1 ± 0.9           | 116/134                  | -6.3                                  | 0.06                  |
| CF2154***                                                                      |                     | 21.8 ± 0.5           | 77/115                   | -34.3                                 | <0.0001               |
| CF2155                                                                         |                     | 25.7 ± 0.8           | 116/135                  | -22.5                                 | <0.0001               |
| <i>glp-1(-)</i>                                                                | 3                   | 29.5 ± 0.4           | 166/195                  |                                       |                       |
| CF2152                                                                         |                     | 22.5 ± 1.2           | 76/91                    | -23.7                                 | <0.0001               |

|                 |   |            |         |       |         |
|-----------------|---|------------|---------|-------|---------|
| CF2153          |   | 32.3 ± 1.5 | 98/121  | ±9.4  | 0.004   |
| CF2154          |   | 25.0 ± 1.3 | 75/116  | -15.2 | 0.0007  |
| CF2155          |   | 24.5 ± 1.0 | 86/107  | -16.9 | <0.0001 |
|                 |   |            |         |       |         |
| <i>glp-1(-)</i> | 4 | 30.1 ± 1.1 | 102/103 |       |         |
| CF2152          |   | 23.5 ± 1.1 | 81/102  | -21.9 | 0.0003  |
| CF2153          |   | 27.1 ± 0.8 | 103/107 | -9.9  | 0.009   |
| CF2154          |   | 24.3 ± 1.0 | 89/99   | -19.2 | 0.0003  |
| CF2155          |   | 21.1 ± 0.8 | 82/90   | -29.9 | <0.0001 |

| Table S1. C: Rescue of <i>tcer-1(-); glp-1(-)</i> shortened lifespan by TCER-1::GFP ( <i>tcer-1 OE</i> ) |       |                      |                          |                               |             |
|----------------------------------------------------------------------------------------------------------|-------|----------------------|--------------------------|-------------------------------|-------------|
| Genotype                                                                                                 | Trial | Mean LS ± SEM (days) | Events/ Obs <sup>a</sup> | P vs Control                  | P vs CF2154 |
| N2                                                                                                       | 1     | 18.6 ± 0.4           | 61/96                    |                               |             |
| CF2166 <sup>#</sup><br><i>tcer-1(-) Line#8</i>                                                           |       | 19.1 ± 0.2           | 50/64                    | 0.28<br>(vs N2)               |             |
| CF2167<br><i>tcer-1(-) Line#9</i>                                                                        |       | 19.8 ± 0.6           | 68/81                    | 0.08<br>(vs N2)               |             |
| <i>glp-1(-)</i> <sup>#</sup>                                                                             |       | 31.1 ± 0.7           | 204/241                  |                               |             |
| CF2154 <sup>#</sup><br><i>tcer-1(-); glp-1(-)</i>                                                        |       | 23.4 ± 0.5           | 81/119                   | <0.0001<br>(vs <i>glp-1</i> ) |             |
| CF2859a <sup>#</sup><br><i>tcer-1(-); glp-1(-); tcer-1 OE Line #24</i>                                   |       | 32.4 ± 0.3           | 111/116                  | 0.5<br>(vs <i>glp-1</i> )     | <0.0001     |
| CF2859b<br><i>tcer-1(-); glp-1(-); tcer-1 OE Line #81</i>                                                |       | 30.9 ± 0.8           | 96/123                   | 0.42<br>(vs <i>glp-1</i> )    | <0.0001     |
|                                                                                                          |       |                      |                          |                               |             |
| N2                                                                                                       | 2     | 18.5 ± 0.5           | 94/116                   |                               |             |
| CF2166                                                                                                   |       | 18.6 ± 0.5           | 91/108                   | 0.63<br>(vs N2)               |             |
| CF2167                                                                                                   |       | 19.4 ± 0.6           | 91/105                   | 0.1<br>(vs N2)                |             |
| <i>glp-1(-)</i>                                                                                          |       | 33.2 ± 0.7           | 233/258                  |                               |             |
| CF2154                                                                                                   |       | 21.8 ± 1.0           | 77/115                   | <0.0001<br>(vs <i>glp-1</i> ) |             |
| CF2859a                                                                                                  |       | 27.9 ± 0.8           | 100/102                  | <0.0001<br>(vs <i>glp-1</i> ) | 0.0003      |

|                                                              |         |            |        |                               |         |
|--------------------------------------------------------------|---------|------------|--------|-------------------------------|---------|
| CF2859b                                                      |         | 25.8 ± 1.2 | 67/72  | <0.0001<br>(vs <i>glp-1</i> ) | 0.02    |
| CF2859c<br><i>tcer-1(-); glp-1(-); tcer-1 OE</i><br>Line #91 |         | 28.8 ± 1.1 | 85/89  | 0.003<br>(vs <i>glp-1</i> )   | <0.0001 |
|                                                              |         |            |        |                               |         |
| N2***                                                        | 1\$\$\$ | 18.9 ± 0.5 | 60/121 |                               |         |
| CF2166***                                                    |         | 19.0 ± 0.4 | 96/110 | 0.84                          |         |
| CF2167                                                       |         | 18.3 ± 0.4 | 48/120 | 0.93                          |         |
|                                                              |         |            |        |                               |         |
| N2                                                           | 2       | 17.0 ± 0.3 | 75/89  |                               |         |
| CF2166                                                       |         | 13.9 ± 0.4 | 65/89  | <0.0001                       |         |
| CF2167                                                       |         | 13.6 ± 0.6 | 70/83  | <0.0001                       |         |

<sup>a</sup> Some animals were censored as described in Materials and Methods.

<sup>b</sup> RNAi control refers to worms exposed to empty vector plasmid without an RNAi insert.

LS: lifespan, SEM: standard error of the mean.

MV refers to clones obtained from the RNAi library described earlier [1]. All other clones were obtained from the Ahringer collection [2].

\*, \*\*, \*\*\* Experiments depicted in Figures 1A, 1B and 1C, respectively.

<sup>#</sup> Experiment depicted in Figure 2D.

\$. \$\$, \$\$\$ Experiments performed simultaneously.

## References:

1. Lamesch, P, Milstein, S, Hao, T, Rosenberg, J, Li N, *et al.* (2004) *C. elegans* ORFeome version 3.1: increasing the coverage of ORFeome resources with improved gene predictions. *Genome Res* 14: 2064-2069.
2. Kamath, RS, Fraser, AG, Dong, Y, Poulin, G, Durbin, R *et al.* (2003) Systematic functional analysis of the *Caenorhabditis elegans* genome using RNAi. *Nature* 421: 231-237.
